# ANESTHESIOLOGY

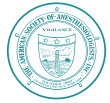

## Searching for Quality Hip Fractures and Type of Anesthesia

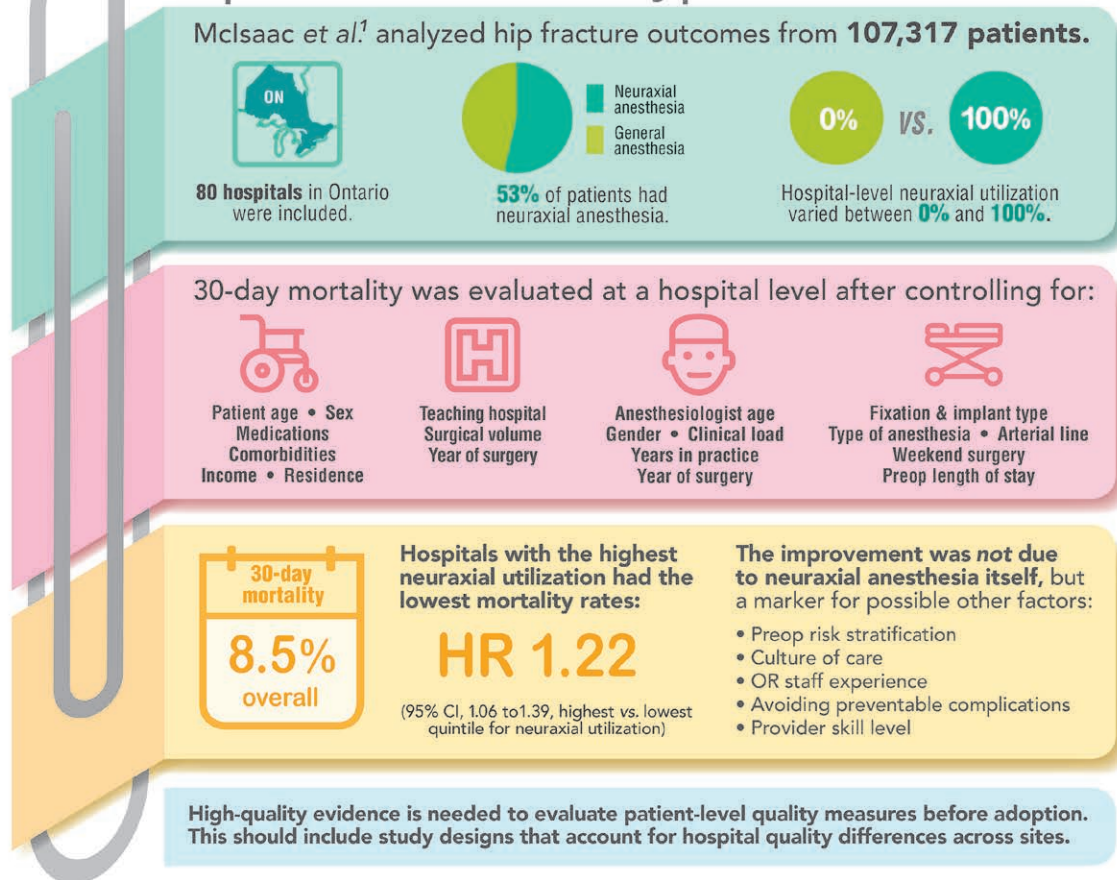

HR = hazard ratio; OR = operating room; preop = preoperative.

Infographic created by Jonathan P. Wanderer, Vanderbilt University Medical Center, and James P. Rathmell, Brigham and Women's Health Care/Harvard Medical School. Illustration by Annemarie Johnson, Vivo Visuals. Address correspondence to Dr. Wanderer: jonathan.p.wanderer@vanderbilt.edu.

1. McIsaac DI, Wijeyesundera DN, Huang A, Bryson GL, van Walraven C: Association of hospital-level neuraxial anesthesia use for hip fracture surgery with outcomes: A population-based cohort study. *ANESTHESIOLOGY* 2018; 128:480–91
